# Supplementary material for: Novel route to enhance the thermo-optical performance of bicyclic diene photoswitches for solar thermal batteries
Source: publisher site journal article supplement (doi:10.3762/bjoc.20.93), 2024-05-13
Supplement: Additional file 1 [file 1860-5397-20-93-S1.pdf]

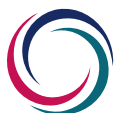

## Supporting Information

for

### **Novel route to enhance the thermo-optical performance of bicyclic diene photoswitches for solar thermal batteries**

Akanksha Ashok Sangolkar, Rama Krishna Kadiyam and Ravinder Pawar

*Beilstein J. Org. Chem.* **2024**, *20*, 1053–1068. [doi:10.3762/bjoc.20.93](https://doi.org/10.3762/bjoc.20.93)

### **Additional tables, figures and Cartesian coordinates**

## S1. Optimized geometries of the transition states along the displacement vectors.

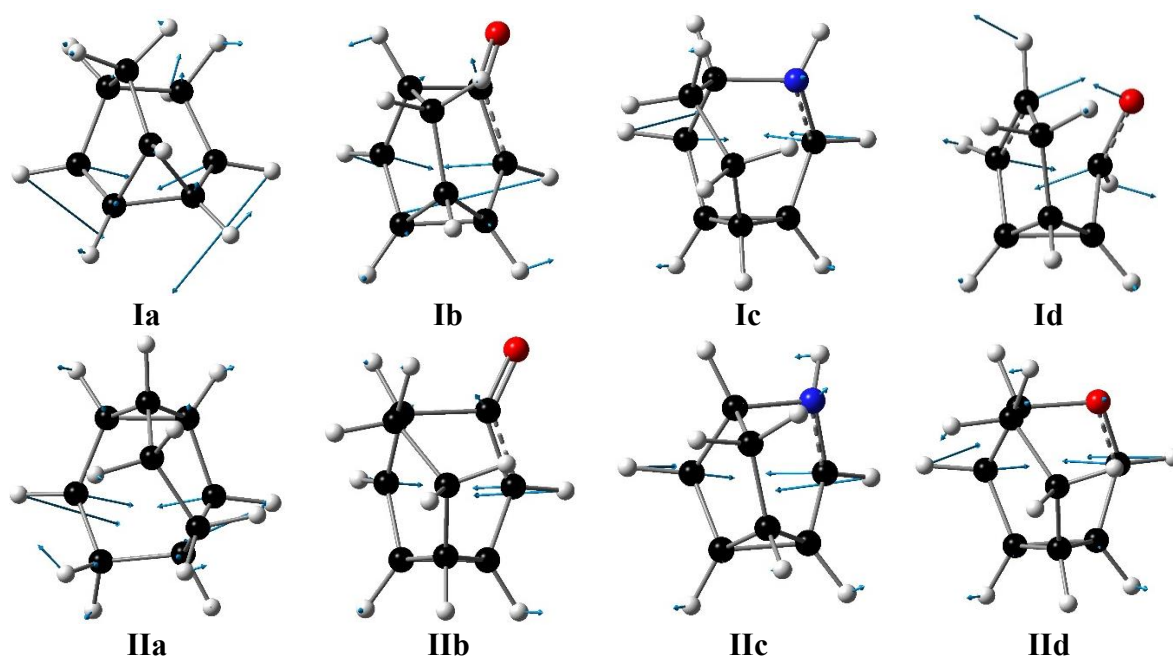

**Figure S1:** Optimized geometries of TS involved in the back isomerization of the photoproducts to the parent bicyclic dienes illustrating the displacement vectors at the PBE/6-311++G\*\* level of theory (TS for type Id photoswitch is associated with the thermal degradation to carbonyl compound).

## S2. Solar energy conversion efficiencies and the reality check for the energy storage efficiencies of the studied BBD-based photoswitches in gas phase.

**Table S1:** The calculated energy of the photon involved for the first important electronic excitation (with oscillatory strength higher than 0.01), sum of storage energy (SE) and the TBR barrier, and the solar energy conversion efficiency of the studied BBD-based photoswitches.

| System | $E_{\text{photon}}$<br>(kJ/mol) | SE + TBR barrier<br>(kJ/mol) | $\eta_{\text{efficiency}}$ |
|--------|---------------------------------|------------------------------|----------------------------|
| Ia     | 562.15                          | 290.79                       | 10.06                      |
| Ib     | 483.97                          | 248.29                       | 7.78                       |
| Ic     | 479.18                          | 313.57                       | 10.08                      |
| IIa    | 579.08                          | 293.49                       | 9.36                       |
| IIb    | 507.19                          | 280.26                       | 7.99                       |
| IIc    | 475.43                          | 305.76                       | 10.31                      |
| IIId   | 497.66                          | 282.86                       | 8.89                       |

### S3. Effect of solvation on the thermochemical properties

**Table S2:** Effect of solvation on the thermochemical properties of the studied BBD-based photoswitches. The energy storage capacities were calculated at DLPNO-CCSD(T)/Def2TZVP level for the geometries optimized with the M062X/6-311++G\*\*. The TBR barrier were calculated at (8,8)-CASPT2/6-311++G\*\* level for the geometries optimized with the PBE/6-311++G\*\* (SMD solvation model).

| Medium          | Ia                             | Ic     | IIa    | IIc    |
|-----------------|--------------------------------|--------|--------|--------|
|                 | <b>Storage energy (kJ/mol)</b> |        |        |        |
| Gas             | 141.15                         | 158.38 | 156.35 | 165.74 |
| Cyclohexane     | 143.57                         | 158.61 | 158.95 | 167.31 |
| Toluene         | 143.96                         | 158.60 | 159.35 | 167.49 |
| Dichloromethane | 145.72                         | 158.56 | 161.05 | 168.32 |
| Ethanol         | 146.14                         | 158.81 | 161.46 | 168.88 |
| Acetonitrile    | 146.22                         | 158.57 | 161.55 | 168.72 |
|                 | <b>ESD (MJ/kg)</b>             |        |        |        |
| Gas             | 1.33                           | 1.48   | 1.30   | 1.37   |
| Cyclohexane     | 1.35                           | 1.48   | 1.32   | 1.38   |
| Toluene         | 1.36                           | 1.48   | 1.33   | 1.38   |
| Dichloromethane | 1.37                           | 1.48   | 1.34   | 1.39   |
| Ethanol         | 1.38                           | 1.48   | 1.34   | 1.39   |
| Acetonitrile    | 1.38                           | 1.48   | 1.35   | 1.39   |
|                 | <b>TBR barrier (kJ/mol)</b>    |        |        |        |
| Gas             | 149.64                         | 155.19 | 137.14 | 140.02 |
| Cyclohexane     | 148.27                         | 160.99 | 137.44 | 139.83 |
| Toluene         | 148.17                         | 153.44 | 137.23 | 139.83 |
| Dichloromethane | 145.26                         | 162.67 | 137.05 | 139.89 |
| Ethanol         | 145.93                         | 139.14 | 135.82 | 139.81 |
| Acetonitrile    | 146.12                         | 136.36 | 137.50 | 139.70 |

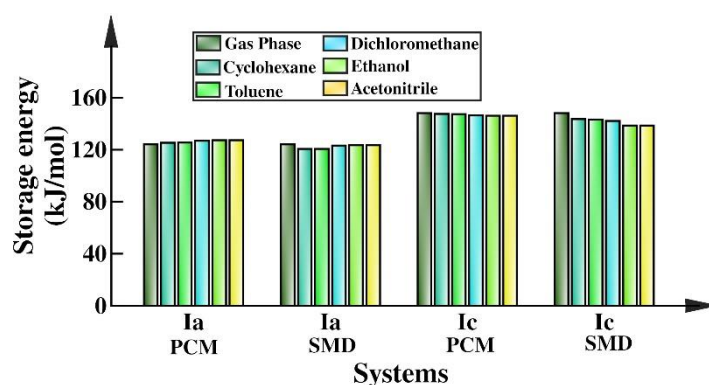

**Figure S2:** Effect of solvation model on storage energies of type Ia and Ic photoswitches in different polarity solvents calculated at the M062X/6-311++G\*\* level of theory

#### S4. Effect of solvation on the photophysical properties of the studied BBD-based photoswitches

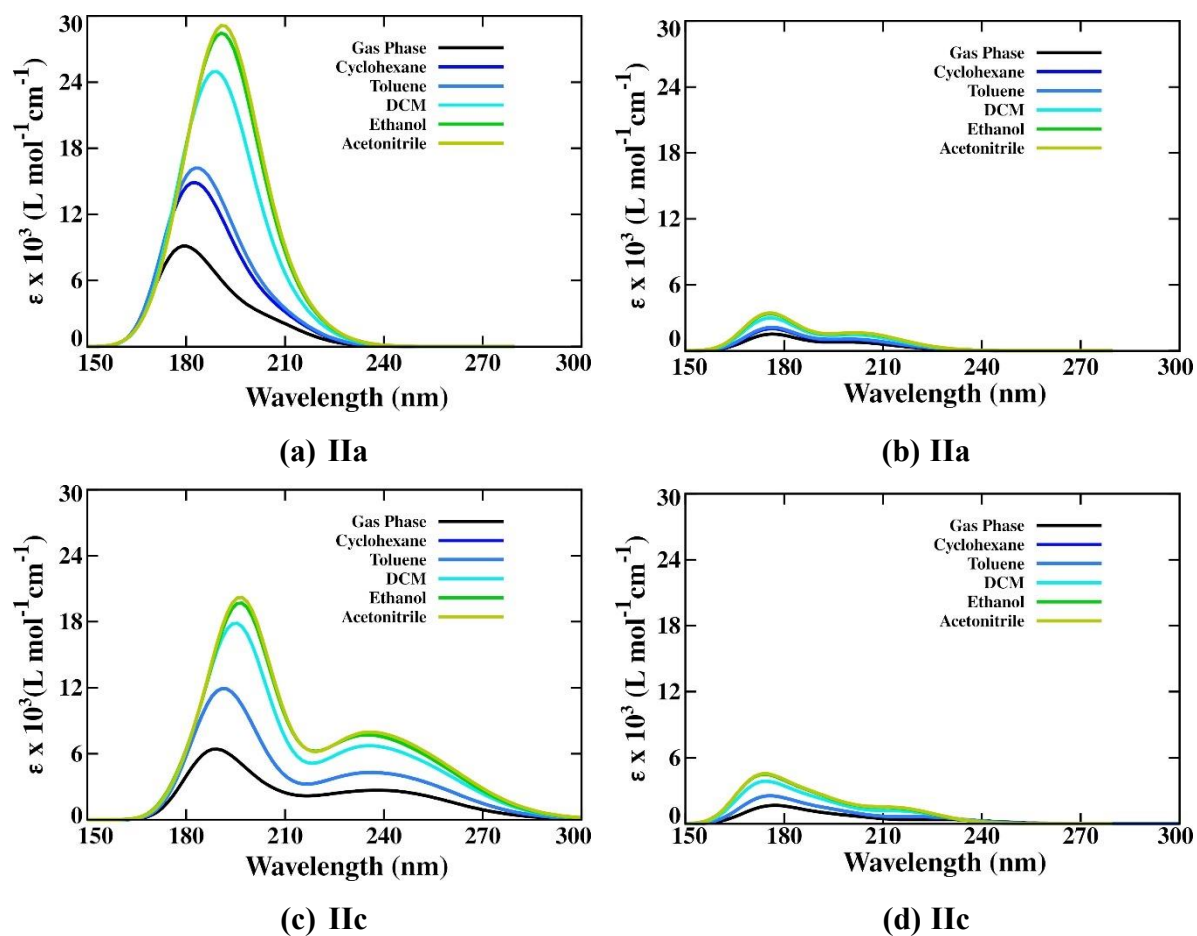

**Figure S3:** Effect of different polarity solvents on the optical absorption spectra of dienes and photoproducts of IIa and IIc photoswitches (M062X/6-311++G\*\*).

**Table S3:** Spectral data for the optical absorption of the diene and photoproducts of Ia and Ic photoswitches in the presence of different polarity solvents (M062X/6-311++G\*\* considering SMD solvation model).

| Systems | Medium          | $\lambda_{onset}$ | $f$   | $\lambda$ (nm) | $\epsilon$                             | $\lambda_{onset}$ | $f$   | $\lambda$ | $\epsilon$                             |
|---------|-----------------|-------------------|-------|----------------|----------------------------------------|-------------------|-------|-----------|----------------------------------------|
|         |                 | (nm)              |       |                | (Lmol <sup>-1</sup> cm <sup>-1</sup> ) | (nm)              |       | (nm)      | (Lmol <sup>-1</sup> cm <sup>-1</sup> ) |
|         |                 | Diene             |       |                |                                        | Photoproduct      |       |           |                                        |
| Ia      | Gas             | 241.12            | 0.029 | 212.80         | 2151.00                                | 216.48            | 0.010 | 185.09    | 1377.58                                |
|         | Cyclohexane     | 244.72            | 0.022 | 217.36         | 2481.97                                | 218.40            | 0.013 | 184.90    | 1812.15                                |
|         | Toluene         | 245.44            | 0.026 | 217.68         | 2631.70                                | 218.72            | 0.010 | 193.87    | 1198.71                                |
|         | Dichloromethane | 250.40            | 0.044 | 219.75         | 3758.86                                | 220.00            | 0.015 | 194.01    | 1579.31                                |
|         | Ethanol         | 252.00            | 0.050 | 220.51         | 4228.76                                | 220.64            | 0.017 | 194.07    | 1751.84                                |
|         | Acetonitrile    | 252.00            | 0.051 | 220.64         | 4380.79                                | 220.96            | 0.018 | 194.17    | 1790.76                                |
| Ic      | Gas             | 295.60            | 0.043 | 249.65         | 2375.97                                | 251.20            | 0.011 | 177.38    | 1669.30                                |
|         | Cyclohexane     | 299.00            | 0.061 | 250.45         | 3608.89                                | 247.60            | 0.014 | 224.13    | 609.59                                 |
|         | Toluene         | 299.50            | 0.061 | 250.52         | 3620.59                                | 247.60            | 0.014 | 224.08    | 609.70                                 |
|         | Dichloromethane | 303.50            | 0.023 | 262.01         | 3659.86                                | 244.00            | 0.024 | 218.04    | 1105.17                                |
|         | Ethanol         | 303.50            | 0.034 | 260.50         | 4404.56                                | 242.20            | 0.030 | 215.68    | 1398.38                                |
|         | Acetonitrile    | 305.00            | 0.034 | 261.16         | 4784.67                                | 242.92            | 0.031 | 216.08    | 1425.70                                |

**Table S4:** Spectral data for the optical absorption of the diene and photoproducts of IIa and IIc photoswitches in the presence of different polarity solvents (M062X/6-311++G\*\* considering SMD solvation model).

| Systems    | Medium                 | $\lambda_{onset}$ | $f$   | $\lambda$ (nm) | $\epsilon$                             | $\lambda_{onset}$   | $f$   | $\lambda$ | $\epsilon$                             |
|------------|------------------------|-------------------|-------|----------------|----------------------------------------|---------------------|-------|-----------|----------------------------------------|
|            |                        | (nm)              |       |                | (Lmol <sup>-1</sup> cm <sup>-1</sup> ) | (nm)                |       | (nm)      | (Lmol <sup>-1</sup> cm <sup>-1</sup> ) |
|            |                        | <b>Diene</b>      |       |                |                                        | <b>Photoproduct</b> |       |           |                                        |
| <b>IIa</b> | <b>Gas</b>             | 233.92            | 0.022 | 206.58         | 2697.24                                | 229.96              | 0.010 | 172.85    | 1376.49                                |
|            | <b>Cyclohexane</b>     | 236.08            | 0.031 | 208.27         | 3564.67                                | 232.12              | 0.013 | 204.69    | 951.39                                 |
|            | <b>Toluene</b>         | 236.80            | 0.034 | 208.56         | 3833.06                                | 232.48              | 0.013 | 204.81    | 1008.82                                |
|            | <b>Dichloromethane</b> | 240.04            | 0.057 | 210.62         | 6334.85                                | 234.28              | 0.020 | 205.20    | 1383.39                                |
|            | <b>Ethanol</b>         | 241.12            | 0.062 | 211.16         | 7580.02                                | 235.00              | 0.023 | 205.36    | 1546.73                                |
|            | <b>Acetonitrile</b>    | 241.48            | 0.063 | 211.30         | 7982.72                                | 235.00              | 0.024 | 205.39    | 1578.63                                |
| <b>IIc</b> | <b>Gas</b>             | 292.20            | 0.029 | 251.62         | 2162.12                                | 247.40              | 0.013 | 202.79    | 1292.60                                |
|            | <b>Cyclohexane</b>     | 296.20            | 0.042 | 252.51         | 2994.26                                | 247.60              | 0.016 | 200.60    | 1758.85                                |
|            | <b>Toluene</b>         | 297.40            | 0.045 | 252.57         | 3211.26                                | 247.60              | 0.016 | 200.05    | 1877.45                                |
|            | <b>Dichloromethane</b> | 302.50            | 0.066 | 252.98         | 4787.90                                | 246.00              | 0.014 | 222.39    | 913.87                                 |
|            | <b>Ethanol</b>         | 303.00            | 0.014 | 263.95         | 3286.29                                | 245.20              | 0.019 | 220.07    | 1273.94                                |
|            | <b>Acetonitrile</b>    | 304.50            | 0.014 | 264.66         | 3444.76                                | 245.60              | 0.020 | 220.24    | 1283.45                                |

## CARTESIAN COORDINATES

### Ia-R<sub>1</sub>

|   |             |             |             |
|---|-------------|-------------|-------------|
| C | -1.65384700 | 0.30952200  | -0.36945100 |
| C | -0.86544900 | 1.35879000  | -0.13630600 |
| C | 0.55044300  | 1.13653100  | 0.37408700  |
| H | 0.97655600  | 2.04517700  | 0.79899500  |
| C | 1.36368600  | 0.53603700  | -0.77272200 |
| C | 1.19356200  | -0.78466400 | -0.78795500 |
| C | 0.26307400  | -1.19946400 | 0.34095100  |
| H | 0.47589600  | -2.19208500 | 0.74137300  |
| C | 0.51102700  | -0.05891200 | 1.34469000  |
| H | 1.89579400  | 1.12486900  | -1.50960800 |
| H | 1.56900000  | -1.46648400 | -1.54159300 |
| H | 1.47713500  | -0.18845000 | 1.83629600  |
| H | -0.27525200 | 0.03593200  | 2.09611700  |
| H | -1.21216600 | 2.36828000  | -0.33139800 |
| H | -2.65939100 | 0.45705300  | -0.75210100 |
| C | -1.20441100 | -1.11625000 | -0.13954100 |
| H | -1.33464800 | -1.69103800 | -1.06446200 |
| H | -1.86143100 | -1.58279700 | 0.60386800  |

### Ia-P<sub>1</sub>

|   |             |             |             |
|---|-------------|-------------|-------------|
| C | -0.53969300 | -1.20081000 | -0.27611800 |
| C | 0.88156100  | -0.83572200 | -0.74300900 |
| C | 1.23518100  | 0.60099400  | -0.42303900 |
| H | 2.17410200  | 0.94163200  | -0.84271400 |
| C | 1.28845800  | -0.42165500 | 0.66665200  |
| C | -0.19618800 | -0.51626800 | 1.07260100  |
| C | -0.96097300 | 0.74578500  | 0.50384400  |
| H | -1.61290100 | 1.30409500  | 1.17434400  |
| C | 0.12366800  | 1.59879100  | -0.15916700 |
| H | 2.16401900  | -0.67820900 | 1.24605500  |
| H | -0.49576500 | -0.93063100 | 2.03075100  |
| H | 0.49097300  | 2.37544900  | 0.51855600  |
| H | -0.24906200 | 2.08417000  | -1.06511200 |
| H | 1.45852600  | -1.38726200 | -1.47387700 |
| H | -0.75566600 | -2.26705300 | -0.33022400 |
| C | -1.63780200 | -0.16334100 | -0.55425200 |
| H | -2.61033300 | -0.52736000 | -0.21627700 |
| H | -1.72916500 | 0.23853400  | -1.56658100 |

### Ib-R<sub>1</sub>

|   |             |             |             |
|---|-------------|-------------|-------------|
| C | -0.83172800 | 1.34779900  | -0.28197800 |
| C | 0.47054300  | 1.63343500  | -0.17476200 |
| C | 1.45256600  | 0.56189000  | 0.25971500  |
| H | 2.40039300  | 0.99489300  | 0.57777300  |
| C | 1.58664200  | -0.47191700 | -0.86574500 |
| C | 0.60851400  | -1.36530000 | -0.76140300 |
| C | -0.26750000 | -1.03603600 | 0.44518200  |
| H | -0.75948000 | -1.89435400 | 0.90053600  |
| C | 0.74948800  | -0.29380600 | 1.33453800  |
| H | 2.32497700  | -0.40858500 | -1.65423600 |
| H | 0.39110100  | -2.17079900 | -1.45003200 |
| H | 1.44445700  | -1.00697700 | 1.78090000  |
| H | 0.28787300  | 0.31021000  | 2.11707700  |
| H | 0.83939700  | 2.62659400  | -0.41288900 |
| H | -1.57013600 | 2.07375800  | -0.60238100 |
| C | -1.33278200 | -0.02888400 | 0.00214400  |
| O | -2.49663000 | -0.32597800 | -0.12536200 |

### Ib-P<sub>1</sub>

|   |             |             |             |
|---|-------------|-------------|-------------|
| C | -0.34223600 | -1.20636700 | -0.05625500 |
| C | 0.95525600  | -0.88121900 | -0.83722800 |
| C | 1.39550300  | 0.55574500  | -0.65946800 |
| H | 2.22123800  | 0.85265500  | -1.29448400 |
| C | 1.67212500  | -0.43328400 | 0.42503600  |
| C | 0.31469400  | -0.46851700 | 1.15881600  |
| C | -0.51962300 | 0.80754400  | 0.75173100  |
| H | -1.01134000 | 1.40868300  | 1.51424800  |
| C | 0.38769200  | 1.59573100  | -0.21170100 |

### Ia-TS

|   |             |             |             |
|---|-------------|-------------|-------------|
| C | 0.64726900  | 1.45624500  | -0.10263600 |
| C | -0.81347000 | 1.15146300  | -0.21558100 |
| C | -1.18890800 | -0.28735700 | -0.76710100 |
| H | -2.05519000 | -0.35711500 | -1.43394800 |
| C | -1.29023100 | 0.13880600  | 0.72508300  |
| C | -0.06771200 | -0.46287800 | 1.37215800  |
| C | 0.88725700  | -0.89689900 | 0.28701300  |
| H | 1.55158500  | -1.72374900 | 0.57525200  |
| C | -0.04832600 | -1.26658500 | -0.91261200 |
| H | -2.24740500 | 0.22600600  | 1.24469100  |
| H | -0.16457200 | -1.05751000 | 2.28636100  |
| H | -0.42145200 | -2.29582500 | -0.78910200 |
| H | 0.45717700  | -1.20350400 | -1.89140300 |
| H | -1.48004600 | 1.95526000  | -0.53773900 |
| H | 0.95702200  | -2.42272100 | -0.52426900 |
| C | 1.66616600  | 0.36740000  | -0.12579200 |
| H | 2.45714100  | 0.53860100  | 0.61958100  |
| H | 2.19346500  | 0.29394800  | -1.11260700 |

### Ia-P<sub>2</sub>

|   |             |             |             |
|---|-------------|-------------|-------------|
| C | 1.64982300  | -0.32722400 | 0.48076900  |
| C | 0.63039000  | -1.06482000 | -0.31162000 |
| C | -0.80886900 | -1.15328900 | 0.12588400  |
| H | -1.28956000 | -2.12192300 | 0.09426900  |
| C | -0.44885700 | -0.42514100 | -1.16076400 |
| C | -0.79224100 | 1.00352600  | -0.90458200 |
| C | -1.25350300 | 1.18908800  | 0.33050900  |
| H | -1.51394100 | 2.14814900  | 0.76147400  |
| C | -1.32102600 | -0.10397300 | 1.11011600  |
| H | -0.64398900 | -0.85901200 | -2.13343000 |
| H | -0.65152900 | 1.78469800  | -1.64177200 |
| H | -2.34091900 | -0.32535900 | 1.43738000  |
| H | -0.69908200 | -0.05227100 | 2.01209100  |
| H | 1.00469700  | -1.99882600 | -0.72246900 |
| H | 1.94579400  | -0.80643900 | 1.41306400  |
| C | 2.22198300  | 0.81841500  | 0.13165700  |
| H | 1.94726300  | 1.32511300  | -0.78714700 |
| H | 2.97506600  | 1.28637200  | 0.75471700  |

### Ib-TS

|   |             |             |             |
|---|-------------|-------------|-------------|
| C | -0.52377500 | -1.25650600 | -0.33774200 |
| C | 0.98758400  | -1.13320500 | -0.47256000 |
| C | 1.59595500  | 0.27108200  | -0.59100800 |
| H | 2.56584600  | 0.33872300  | -1.08718400 |
| C | 1.48870500  | -0.44287500 | 0.75368000  |
| C | 0.16834300  | 0.06685100  | 1.31301600  |
| C | -0.43749400 | 1.04394500  | 0.39160000  |
| H | -1.06370400 | 1.84086400  | 0.80425700  |
| C | 0.63627300  | 1.44310900  | -0.63306300 |
| H | 2.32608500  | -0.74977600 | 1.38234100  |
| H | -0.20534200 | -0.13972100 | 2.31662100  |
| H | 1.15070500  | 2.36638200  | -0.31808800 |
| H | 0.20579900  | 1.61927600  | -1.63132400 |
| H | 1.53270800  | -1.96259800 | -0.92473600 |
| H | -0.99143300 | -2.21051600 | -0.61163600 |
| C | -1.36897800 | -0.12104400 | -0.16644000 |
| O | -2.60004100 | -0.04134700 | -0.18439400 |

### Ib-P<sub>2</sub>

|   |             |             |             |
|---|-------------|-------------|-------------|
| C | 1.05844100  | 1.05904500  | -0.53794600 |
| C | -0.14834300 | 1.33928600  | 0.29203400  |
| C | -1.51256500 | 0.81435600  | -0.08510700 |
| H | -2.34609900 | 1.50116700  | -0.02342100 |
| C | -0.82824700 | 0.30873100  | 1.17154500  |
| C | -0.52992500 | -1.12881300 | 0.90405600  |
| C | -0.91596200 | -1.49012400 | -0.31874500 |
| H | -0.75144900 | -2.46523500 | -0.76083800 |
| C | -1.57978700 | -0.35404200 | -1.06297400 |

|   |             |             |             |
|---|-------------|-------------|-------------|
| H | 2.64678500  | -0.69687100 | 0.80883000  |
| H | 0.21960800  | -0.84832200 | 2.17041600  |
| H | 0.89801000  | 2.40727600  | 0.31402300  |
| H | -0.18390000 | 2.02824200  | -1.03606300 |
| H | 1.32918000  | -1.47649600 | -1.65856500 |
| H | -0.61929700 | -2.25842600 | -0.04089300 |
| C | -1.40155300 | -0.12273300 | -0.08325800 |
| O | -2.53393000 | -0.06226800 | -0.46294400 |

### Ic\_R1

|   |             |             |             |
|---|-------------|-------------|-------------|
| C | -1.62877900 | 0.15117700  | -0.34387200 |
| C | -0.94317800 | 1.28487500  | -0.13012100 |
| C | 0.49073800  | 1.16324000  | 0.36264400  |
| H | 0.87887900  | 2.09871800  | 0.76291900  |
| C | 1.27429900  | 0.59367800  | -0.81317300 |
| C | 1.18343200  | -0.73923100 | -0.81268700 |
| C | 0.30609400  | -1.17030400 | 0.35202000  |
| H | 0.50851800  | -2.16204600 | 0.75540000  |
| C | 0.54193300  | -0.02250500 | 1.34364500  |
| H | 1.70752800  | 1.20259800  | -1.59785200 |
| H | 1.52531000  | -1.40472200 | -1.59614900 |
| H | 1.53072200  | -0.11980900 | 1.79311400  |
| H | -0.22388300 | 0.02642000  | 2.11793700  |
| H | -1.39300100 | 2.24581500  | -0.33760300 |
| H | -2.63591100 | 0.15195300  | -0.74421500 |
| N | -1.11436500 | -1.10609600 | -0.04021700 |
| H | -1.44484700 | -1.86183900 | -0.62276900 |

### Ic-P1

|   |             |             |             |
|---|-------------|-------------|-------------|
| C | -0.54660200 | -1.16248100 | -0.28332200 |
| C | 0.88335000  | -0.82574100 | -0.73433900 |
| C | 1.23123800  | 0.60710700  | -0.39879400 |
| H | 2.17375900  | 0.95282800  | -0.80515200 |
| C | 1.27046900  | -0.42095000 | 0.68715900  |
| C | -0.21784800 | -0.51610600 | 1.07628300  |
| C | -0.98140700 | 0.71496300  | 0.44872300  |
| H | -1.72079500 | 1.24715500  | 1.04616300  |
| C | 0.10317600  | 1.59531900  | -0.16031300 |
| H | 2.13570600  | -0.68779600 | 1.27598600  |
| H | -0.54104600 | -0.92679200 | 2.02863300  |
| H | 0.43436400  | 2.36690700  | 0.54157500  |
| H | -0.26403500 | 2.06756500  | -1.07236800 |
| H | 1.46068900  | -1.37607400 | -1.46507200 |
| H | -0.82848500 | -2.20867200 | -0.39621200 |
| N | -1.54808100 | -0.13183300 | -0.65540500 |
| H | -2.46784800 | -0.46496000 | -0.37810400 |

### Id-R1

|   |             |             |             |
|---|-------------|-------------|-------------|
| C | -1.60763500 | 0.05407000  | -0.37589100 |
| C | -0.99334500 | 1.21980600  | -0.15349200 |
| C | 0.42866400  | 1.17574400  | 0.37862400  |
| H | 0.75611600  | 2.12640900  | 0.79559100  |
| C | 1.28321900  | 0.64064800  | -0.76631800 |
| C | 1.22233300  | -0.69204000 | -0.78643000 |
| C | 0.31496300  | -1.14851200 | 0.33899200  |
| H | 0.48815300  | -2.15265400 | 0.71861000  |
| C | 0.47934400  | -0.01599500 | 1.35348200  |
| H | 1.75046700  | 1.27112000  | -1.51335600 |
| H | 1.61774400  | -1.34737700 | -1.55096000 |
| H | 1.45364600  | -0.09613000 | 1.83628700  |
| H | -0.31375400 | 0.00324100  | 2.10102900  |
| H | -1.50042400 | 2.14806200  | -0.37771600 |
| H | -2.61032100 | -0.03694800 | -0.77392000 |
| O | -1.05086000 | -1.16475700 | -0.14617000 |

### Id-P1

|   |             |             |             |
|---|-------------|-------------|-------------|
| C | -0.47331400 | -1.17745200 | -0.30505700 |
| C | 0.93873900  | -0.74941200 | -0.73569100 |
| C | 1.17341900  | 0.69942800  | -0.36897200 |
| H | 2.09167700  | 1.12471500  | -0.75416700 |
| C | 1.27137500  | -0.34147200 | 0.69966800  |
| C | -0.20941900 | -0.55296500 | 1.06950900  |

|   |             |             |             |
|---|-------------|-------------|-------------|
| H | -1.13290900 | 0.62397600  | 2.16109500  |
| H | -0.03133000 | -1.77137700 | 1.61907400  |
| H | -2.61384300 | -0.59644400 | -1.32396400 |
| H | -1.05175700 | -0.13353100 | -1.99782900 |
| H | -0.16730800 | 2.33967700  | 0.71211100  |
| H | 1.25327400  | 1.62773600  | -1.43908800 |
| C | 1.94969800  | 0.14641200  | -0.22944900 |
| O | 2.73519500  | -0.66188500 | 0.03154600  |

### Ic-TS

|   |             |             |             |
|---|-------------|-------------|-------------|
| C | -0.77742700 | -1.30832600 | -0.17010400 |
| C | 0.70058900  | -1.14126200 | -0.40465500 |
| C | 1.22749500  | 0.30686700  | -0.67629700 |
| H | 2.10688800  | 0.37319500  | -1.32401000 |
| C | 1.24822900  | -0.31663500 | 0.70760800  |
| C | -0.01537600 | 0.16900800  | 1.42918400  |
| C | -0.85843500 | 0.87211000  | 0.32309100  |
| H | -1.56960200 | 1.63585000  | 0.66520700  |
| C | 0.19048300  | 1.40874300  | -0.70268000 |
| H | 2.16150400  | -0.59432400 | 1.23676000  |
| H | 0.17833900  | 0.79190700  | 2.31855000  |
| H | 0.62921800  | 2.35119200  | -0.33900600 |
| H | -0.25200900 | 1.58562400  | -1.69541500 |
| H | 1.24653500  | -1.97240400 | -0.85834100 |
| H | -1.23079800 | -2.29211000 | -0.34439800 |
| N | -1.57255000 | -0.21367500 | -0.36671800 |
| H | -2.55557200 | -0.32623800 | -0.12919800 |

### Ic-P2

|   |             |             |             |
|---|-------------|-------------|-------------|
| C | -1.55315600 | 0.43771900  | 0.09221300  |
| C | -0.76458600 | -0.80332600 | -0.02737900 |
| C | 0.53296800  | -0.87437700 | -0.80414700 |
| H | 0.65716900  | -1.73663100 | -1.44477700 |
| C | 0.56057200  | -1.01655200 | 0.69686000  |
| C | 1.26530700  | 0.20198900  | 1.19221200  |
| C | 1.63495000  | 0.99841100  | 0.18955000  |
| H | 2.12207500  | 1.95935200  | 0.30263600  |
| C | 1.26145500  | 0.41974300  | -1.15773400 |
| H | 0.70380300  | -1.96895000 | -1.19025200 |
| H | 1.42483000  | 0.40382500  | 2.24408200  |
| H | 2.15174200  | 0.21476900  | -1.75976100 |
| H | 0.63767500  | 1.10608600  | -1.74051700 |
| H | -1.39041500 | -1.68381700 | -0.11096700 |
| H | -0.99824600 | 1.36197300  | 0.28002100  |
| N | -2.81780600 | 0.40326300  | -0.01992300 |
| H | -3.20904700 | 1.33891100  | 0.08903600  |

### Id-TS

|   |             |             |             |
|---|-------------|-------------|-------------|
| C | -0.92467000 | -0.91409800 | -0.15081200 |
| C | 0.50732200  | -1.05633400 | -0.69294200 |
| C | 1.28342800  | 0.23638500  | -0.61031600 |
| H | 2.21925800  | 0.29555900  | -1.16686500 |
| C | 1.19903300  | -0.66507000 | 0.61103400  |
| C | -0.06349100 | -0.16730100 | 1.30256500  |
| C | -0.55375800 | 0.99354900  | 0.60634700  |
| H | -1.41129600 | 1.57941600  | 0.93471900  |
| C | 0.45897500  | 1.49278600  | -0.36989500 |
| H | 2.04858200  | -1.14247200 | 1.09781300  |
| H | -0.42948700 | -0.47715700 | 2.28021600  |
| H | 1.07135700  | 2.26320600  | 0.14417600  |
| H | 0.00787600  | 1.94172700  | -1.26422200 |
| H | 0.78258100  | -1.83168100 | -1.41324800 |
| H | -1.31375700 | -1.91300200 | 0.15884900  |
| O | -1.80201800 | -0.02938600 | -0.61841600 |

### Id-P2

|   |             |             |             |
|---|-------------|-------------|-------------|
| C | -1.56265000 | 0.48588800  | 0.08286800  |
| C | -0.80334500 | -0.78021500 | -0.01816700 |
| C | 0.50153500  | -0.88933800 | -0.78799200 |
| H | 0.59657200  | -1.76347100 | -1.41712100 |
| C | 0.52061200  | -1.00913000 | 0.70902500  |
| C | 1.24866300  | 0.20267400  | 1.19189200  |



|   |             |             |             |
|---|-------------|-------------|-------------|
| C | -1.04909500 | 0.60984500  | 0.43637700  |
| H | -1.87891100 | 1.04627800  | 0.99031200  |
| C | -0.03808400 | 1.58854600  | -0.14060600 |
| H | 2.14422200  | -0.55874200 | 1.29706800  |
| H | -0.52008600 | -1.00538700 | 2.00495400  |
| H | 0.20749000  | 2.37786500  | 0.57614500  |
| H | -0.43123300 | 2.03958800  | -1.05314000 |
| H | 1.56465100  | -1.24709100 | -1.46388400 |
| H | -0.73687800 | -2.22101100 | -0.46863000 |
| O | -1.51533300 | -0.25191500 | -0.63250300 |

### IIa-R<sub>1</sub>

|   |             |             |             |
|---|-------------|-------------|-------------|
| C | 1.35589900  | 1.24658900  | -0.08575900 |
| C | 0.11128000  | 1.71622300  | -0.01736500 |
| C | -1.13461400 | 0.86578600  | 0.15866500  |
| H | -1.99126600 | 1.53037400  | 0.28310100  |
| C | -1.01363900 | -0.04772300 | 1.36013100  |
| C | -0.17407000 | -1.07506200 | 1.27451600  |
| C | 0.64001000  | -1.22769900 | 0.01205700  |
| H | 1.10217600  | -2.21776000 | -0.00836200 |
| C | -0.25754300 | -1.08136900 | -1.24207600 |
| C | -1.36829900 | -0.01955400 | -1.08583300 |
| H | -1.60652300 | 0.14190500  | 2.24838000  |
| H | -0.03909800 | -1.77314900 | 2.09402800  |
| H | -0.71440000 | -2.04888800 | -1.46006700 |
| H | 0.38224300  | -0.83838000 | -2.09492500 |
| H | -2.33940300 | -0.50767300 | -0.97178300 |
| H | -1.42257400 | 0.61032200  | -1.97689800 |
| H | -0.03678700 | 2.78934900  | -0.09586500 |
| H | 2.16440300  | 1.96407000  | -0.20235000 |
| C | 1.78371300  | -0.19591800 | -0.01018100 |
| H | 2.41971700  | -0.32919500 | 0.87445600  |
| H | 2.42508800  | -0.40861200 | -0.87463900 |

### IIa-P<sub>1</sub>

|   |             |             |             |
|---|-------------|-------------|-------------|
| C | -1.24326800 | 0.82093200  | -0.41256000 |
| C | -1.36456300 | -0.70597900 | -0.55902600 |
| C | -0.12215700 | -1.49494000 | -0.23344100 |
| H | -0.31885700 | -2.55571200 | -0.36062100 |
| C | -0.91269500 | -0.90710500 | 0.89410200  |
| C | -0.65037800 | 0.60998900  | 0.99795700  |
| C | 0.72654400  | 1.13541600  | 0.47091100  |
| H | 1.10415500  | 1.98684800  | 1.04014500  |
| C | 1.78973000  | 0.05250800  | 0.36340700  |
| C | 1.31883300  | -1.10177800 | -0.52566700 |
| H | -1.36845200 | -1.51292700 | 1.66720900  |
| H | -1.07124400 | 1.11205300  | 1.86681400  |
| H | 1.99680100  | -0.32935500 | 1.36985500  |
| H | 2.72417100  | 0.46931600  | -0.02438400 |
| H | 1.95770800  | -1.97238900 | -0.35386800 |
| H | 1.42938800  | -0.84265200 | -1.58276900 |
| H | -2.18139100 | -1.19626800 | -1.07458900 |
| H | -2.19648700 | 1.33372000  | -0.53769700 |
| C | 0.04400600  | 1.54053200  | -0.87358700 |
| H | -0.10441100 | 2.61969200  | -0.94700400 |
| H | 0.51231300  | 1.19022200  | -1.79566000 |

### IIb-R<sub>1</sub>

|   |             |             |             |
|---|-------------|-------------|-------------|
| C | 0.90104300  | 1.44906200  | -0.04935800 |
| C | -0.40637700 | 1.71849200  | 0.01819400  |
| C | -1.50833600 | 0.69461900  | 0.16726700  |
| H | -2.45565600 | 1.22113100  | 0.28731600  |
| C | -1.27692600 | -0.23033400 | 1.34489100  |
| C | -0.29093200 | -1.11541400 | 1.25482000  |
| C | 0.55912600  | -1.11611600 | 0.00608600  |
| H | 1.20755200  | -1.99106600 | -0.02813400 |
| C | -0.33635800 | -1.07305200 | -1.26685100 |
| C | -1.58641700 | -0.18708500 | -1.10957200 |
| H | -1.92433600 | -0.16797600 | 2.21201400  |
| H | -0.06819600 | -1.81741500 | 2.04966100  |
| H | -0.64049800 | -2.09708000 | -1.48862800 |
| H | 0.27292500  | -0.73762100 | -2.10899900 |
| H | -2.48013000 | -0.80755400 | -1.02029000 |

|   |             |             |             |
|---|-------------|-------------|-------------|
| C | 1.64713100  | 0.96996100  | 0.17827700  |
| H | 2.15733200  | 1.92012700  | 0.27732500  |
| C | 1.26731300  | 0.37798200  | -1.16097400 |
| H | 0.63413000  | -1.95646900 | -1.21934400 |
| H | 1.40242700  | 0.41802100  | 2.24164300  |
| H | 2.15633700  | 0.13089400  | -1.74888300 |
| H | 0.67335600  | 1.07138200  | -1.76486300 |
| H | -1.45016400 | -1.64591200 | -0.09492700 |
| H | -0.97951800 | 1.40693100  | 0.25797600  |
| O | -2.76325400 | 0.53394700  | -0.01750800 |

### IIa-TS

|   |             |             |             |
|---|-------------|-------------|-------------|
| C | -1.00851600 | 1.29174000  | -0.65538900 |
| C | -1.60285000 | -0.04506200 | -0.29854700 |
| C | -0.70931000 | -1.33172300 | -0.31763700 |
| H | -1.27341100 | -2.25575500 | -0.49400300 |
| C | -1.09069400 | -0.53559500 | 0.97584400  |
| C | -0.03869200 | 0.40888000  | 1.47666000  |
| C | 1.07548700  | 0.75131400  | 0.51924100  |
| H | 1.84402700  | 1.35046700  | 1.03284800  |
| C | 1.72215700  | -0.57567200 | 0.03523900  |
| C | 0.72214700  | -1.36804700 | -0.83235500 |
| H | -1.75458700 | -1.01788500 | 1.69743600  |
| H | 0.25385100  | 0.30264000  | 2.52994800  |
| H | 2.00688300  | -1.17494300 | 0.91716800  |
| H | 2.64658300  | -0.38171000 | -0.53451700 |
| H | 1.04601100  | -2.41936100 | -0.90331800 |
| H | 0.74744700  | -0.97595100 | -1.86539200 |
| H | -2.65246700 | -0.20078400 | -0.55979600 |
| H | -1.58275100 | 1.88089800  | -1.38369900 |
| C | 0.45618700  | 1.55339900  | -0.63187300 |
| H | 0.62601500  | 2.62573100  | -0.43608300 |
| H | 0.93689900  | 1.37124900  | -1.62769400 |

### IIa-P<sub>2</sub>

|   |             |             |             |
|---|-------------|-------------|-------------|
| C | -1.64548800 | -0.21514800 | -0.75004500 |
| C | -0.91305500 | -1.11585100 | 0.18227800  |
| C | 0.55658600  | -1.40747400 | 0.09330900  |
| H | 0.83507000  | -2.43448000 | 0.30300000  |
| C | 0.03046000  | -0.61913400 | 1.27382700  |
| C | 0.43156800  | 0.80442200  | 1.36282700  |
| C | 1.00787400  | 1.46149600  | 0.35575400  |
| H | 1.27315200  | 2.50641100  | 0.48008900  |
| C | 1.27742100  | 0.81753200  | -0.97359700 |
| C | 1.49877300  | -0.70012000 | -0.86070700 |
| H | -0.05160100 | -1.13784600 | 2.22115700  |
| H | 0.24351100  | 1.31389100  | 2.30283300  |
| H | 2.15324200  | 1.27423300  | -1.44181000 |
| H | 0.43343100  | 1.02121600  | -1.64162800 |
| H | 2.51620300  | -0.87424200 | -0.49622300 |
| H | 1.43771900  | -1.15410100 | -1.85397200 |
| H | -1.50515600 | -1.97542900 | 0.48548800  |
| H | -1.63840700 | -0.50443500 | -1.80028200 |
| C | -2.32479300 | 0.86158900  | -0.37298000 |
| H | -2.33979700 | 1.17678700  | 0.66487000  |
| H | -2.87344600 | 1.46412400  | -1.08752100 |

### IIb-TS

|   |             |             |             |
|---|-------------|-------------|-------------|
| C | -0.62613100 | -1.33125200 | -0.51656200 |
| C | 0.90496000  | -1.38111200 | -0.47458600 |
| C | 1.71431000  | -0.09934200 | -0.47438900 |
| H | 2.76208300  | -0.25666300 | -0.74489400 |
| C | 1.33344900  | -0.79230600 | 0.83838600  |
| C | -0.00690200 | -0.38412900 | 1.39256700  |
| C | -0.68925000 | 0.76929100  | 0.80024600  |
| H | -1.47595300 | 1.18893000  | 1.43899600  |
| C | 0.20066800  | 1.84264600  | 0.16888000  |
| C | 1.12447500  | 1.24090300  | -0.89922000 |
| H | 2.08780200  | -1.22840400 | 1.49620800  |
| H | -0.40165300 | -0.88029400 | 2.28221800  |
| H | 0.79870500  | 2.32412200  | 0.96270500  |
| H | -0.43668800 | 2.62430800  | -0.27334700 |
| H | 1.94152800  | 1.94284100  | -1.12689600 |

|   |             |             |             |
|---|-------------|-------------|-------------|
| H | -1.71709900 | 0.45135400  | -1.98556200 |
| H | -0.71570900 | 2.75811700  | -0.05201100 |
| H | 1.62690700  | 2.24929400  | -0.14758100 |
| C | 1.49640200  | 0.08798000  | 0.00544100  |
| O | 2.69836100  | -0.05376200 | 0.00708800  |

### I**b**-P<sub>1</sub>

|   |             |             |             |
|---|-------------|-------------|-------------|
| C | -0.29549100 | -1.43368200 | -0.08160500 |
| C | 1.06439200  | -1.12475900 | -0.74946500 |
| C | 1.50784400  | 0.31240300  | -0.66574600 |
| H | 2.46593100  | 0.42940800  | -1.16172900 |
| C | 1.60969000  | -0.54708600 | 0.55690900  |
| C | 0.21799500  | -0.72389900 | 1.20240600  |
| C | -0.80904700 | 0.43505700  | 0.99020100  |
| H | -1.51400800 | 0.57001600  | 1.81263700  |
| C | -0.19151900 | 1.75290600  | 0.53492600  |
| C | 0.61009300  | 1.54034100  | -0.75149400 |
| H | 2.54918900  | -0.75872800 | 1.04893600  |
| H | 0.18486600  | -1.23501900 | 2.16003700  |
| H | 0.46826100  | 2.12149700  | 1.32687600  |
| H | -0.97441600 | 2.49717500  | 0.37596300  |
| H | 1.23089200  | 2.41723700  | -0.94627400 |
| H | -0.07335200 | 1.44254300  | -1.60103800 |
| H | 1.54415600  | -1.80359500 | -1.44097000 |
| H | -0.58117500 | -2.48378200 | -0.09928600 |
| C | -1.40253800 | -0.38339600 | -0.17605900 |
| O | -2.39610700 | -0.27050800 | -0.82944900 |

### I**c**-R<sub>1</sub>

|   |             |             |             |
|---|-------------|-------------|-------------|
| C | 1.44560000  | 1.06735200  | -0.21467200 |
| C | 0.25513000  | 1.67804100  | -0.13832300 |
| C | -1.05259000 | 0.95209200  | 0.13428300  |
| H | -1.84296800 | 1.69422900  | 0.25624200  |
| C | -0.89729900 | 0.14546100  | 1.40623000  |
| C | -0.12738000 | -0.94118500 | 1.36065300  |
| C | 0.56436700  | -1.23953300 | 0.05035800  |
| H | 1.01670200  | -2.23217100 | 0.06726800  |
| C | -0.42741700 | -1.17206300 | -1.12608800 |
| C | -1.43323800 | -0.00252200 | -1.01164500 |
| H | -1.36845500 | 0.47790300  | 2.32566400  |
| H | 0.06838300  | -1.55191900 | 2.23567500  |
| H | -0.96978300 | -2.11925000 | -1.16387600 |
| H | 0.15861800  | -1.09597300 | -2.04434900 |
| H | -2.43747100 | -0.39031400 | -0.81936400 |
| H | -1.47175000 | 0.55759900  | -1.94863300 |
| H | 0.23692200  | 2.75542100  | -0.24307700 |
| H | 2.34774400  | 1.65762000  | -0.33924200 |
| N | 1.67914500  | -0.30252100 | -0.19295700 |
| H | 2.54500700  | -0.56135400 | 0.25961300  |

### I**c**-P<sub>1</sub>

|   |             |             |             |
|---|-------------|-------------|-------------|
| C | -1.11961000 | 0.92245300  | -0.42727600 |
| C | -1.42012900 | -0.57933500 | -0.55581700 |
| C | -0.25571500 | -1.47013700 | -0.20650500 |
| H | -0.54367500 | -2.51073900 | -0.31970400 |
| C | -0.99651600 | -0.79883400 | 0.90729600  |
| C | -0.58996400 | 0.68516600  | 0.99310800  |
| C | 0.80647800  | 1.07593300  | 0.41615200  |
| H | 1.24151400  | 1.95363600  | 0.89887300  |
| C | 1.79054000  | -0.07741400 | 0.34919000  |
| C | 1.21327000  | -1.20495400 | -0.51065400 |
| H | -1.51574500 | -1.34281800 | 1.68472400  |
| H | -0.95552000 | 1.25015700  | 1.84690700  |
| H | 1.97037500  | -0.43453300 | 1.36956200  |
| H | 2.74736200  | 0.25600500  | -0.06052400 |
| H | 1.77601200  | -2.12402000 | -0.32881300 |
| H | 1.32654800  | -0.95106700 | -1.56562900 |
| H | -2.27672700 | -0.99158600 | -1.07355500 |
| H | -1.97137500 | 1.57183800  | -0.62668800 |
| N | 0.20396700  | 1.37633700  | -0.92817000 |
| H | 0.20334500  | 2.37149600  | -1.12092500 |

### I**d**-R<sub>1</sub>

|   |             |             |             |
|---|-------------|-------------|-------------|
| H | 0.55932100  | 1.10444400  | -1.83739100 |
| H | 1.36122800  | -2.29839300 | -0.84964400 |
| H | -1.12786000 | -2.16899900 | -1.01709900 |
| C | -1.44028300 | -0.19134200 | -0.24654400 |
| O | -2.64503600 | -0.04900400 | -0.48294000 |

### I**b**-P<sub>2</sub>

|   |             |             |             |
|---|-------------|-------------|-------------|
| C | 1.48935900  | 0.96277600  | -0.55400400 |
| C | 0.47450000  | 1.46085200  | 0.41540600  |
| C | -1.01498700 | 1.30559100  | 0.15410200  |
| H | -1.62215500 | 2.15198800  | 0.45177500  |
| C | -0.36213300 | 0.52967300  | 1.26580000  |
| C | -0.30461400 | -0.94917700 | 1.11539400  |
| C | -1.08914400 | -1.59293400 | 0.25251300  |
| H | -1.04650100 | -2.67598400 | 0.19391500  |
| C | -2.05110300 | -0.86553100 | -0.65356400 |
| C | -1.51116200 | 0.51639700  | -1.04782900 |
| H | -0.53152200 | 0.87661100  | 2.27939600  |
| H | 0.37736900  | -1.50185500 | 1.75478400  |
| H | -3.01573300 | -0.76170300 | -0.14190900 |
| H | -2.24136900 | -1.45992200 | -1.55028700 |
| H | -2.28340400 | 1.08822800  | -1.56642500 |
| H | -0.68928500 | 0.37220300  | -1.75434900 |
| H | 0.75336900  | 2.38665400  | 0.90727200  |
| H | 1.75467600  | 1.54497000  | -1.42889700 |
| C | 2.14703600  | -0.16450300 | -0.40742000 |
| O | 2.73475500  | -1.15500700 | -0.29845700 |

### I**c**-TS

|   |             |             |             |
|---|-------------|-------------|-------------|
| C | 1.16694400  | -1.09133200 | -0.60515200 |
| C | 1.52343900  | 0.36438500  | -0.37919500 |
| C | 0.39798300  | 1.43860900  | -0.28153800 |
| H | 0.78408600  | 2.44251600  | -0.49111300 |
| C | 0.98372700  | 0.73499700  | 0.94792600  |
| C | 0.24075700  | -0.50647900 | 1.42193900  |
| C | -0.85806000 | -0.96302500 | 0.45496600  |
| H | -1.40563800 | -1.82045000 | 0.87687900  |
| C | -1.81042100 | 0.19873900  | 0.11076700  |
| C | -1.03706700 | 1.22675800  | -0.73931400 |
| H | 1.58261700  | 1.30383300  | 1.66330500  |
| H | -0.12773400 | -0.43747200 | 2.45857700  |
| H | -2.16004600 | 0.65345300  | 1.05238700  |
| H | -2.70193300 | -0.14814500 | -0.43786700 |
| H | -1.56096400 | 2.19716200  | -0.72418700 |
| H | -1.03891800 | 0.88206900  | -1.78921500 |
| H | 2.50016200  | 0.69351600  | -0.74462400 |
| H | 1.88311800  | -1.70027500 | -1.17175100 |
| N | -0.15221500 | -1.43981400 | -0.75035300 |
| H | -0.33305600 | -2.40341700 | -1.02230600 |

### I**c**-P<sub>2</sub>

|   |             |             |             |
|---|-------------|-------------|-------------|
| C | -1.79328000 | -0.09492900 | 0.54755800  |
| C | -1.17908500 | 0.09238800  | -0.77940000 |
| C | 0.13286000  | 0.84273300  | -0.95242800 |
| H | 0.17637900  | 1.44089700  | -1.85410000 |
| C | 0.10519100  | -0.64072200 | -1.14600000 |
| C | 0.83489700  | -1.46484600 | -0.14601400 |
| C | 1.77449800  | -0.93584200 | 0.63655200  |
| H | 2.31593500  | -1.56962100 | 1.33196300  |
| C | 2.13019400  | 0.52985900  | 0.57977400  |
| C | 0.90786500  | 1.39505900  | 0.24037200  |
| H | 0.13099900  | -1.01712300 | -2.16268200 |
| H | 0.59689000  | -2.52247000 | -0.08540600 |
| H | 2.91050600  | 0.67734000  | -0.17667900 |
| H | 2.56096300  | 0.84975200  | 1.53123700  |
| H | 1.22418600  | 2.41626000  | 0.01940300  |
| H | 0.26588700  | 1.45942800  | 1.12192000  |
| H | -1.90834300 | 0.21766700  | -1.57014200 |
| H | -1.11666800 | -0.36102400 | 1.36652100  |
| N | -3.04740500 | 0.03018300  | 0.70297700  |
| H | -3.30374700 | -0.14458600 | 1.67464300  |

### I**d**-TS

|   |             |             |             |
|---|-------------|-------------|-------------|
| C | -1.39602000 | 1.09566400  | 0.12448200  |
| C | -0.18609200 | 1.65742000  | 0.07108200  |
| C | 1.10574000  | 0.88742300  | -0.13924400 |
| H | 1.92648700  | 1.59524900  | -0.25931600 |
| C | 0.96947000  | 0.02323300  | -1.37590400 |
| C | 0.12834500  | -1.00578200 | -1.31308800 |
| C | -0.64078800 | -1.18301700 | -0.02910300 |
| H | -1.17357700 | -2.13244000 | -0.01718100 |
| C | 0.26424600  | -1.08181800 | 1.20856000  |
| C | 1.39111500  | -0.03638000 | 1.05808200  |
| H | 1.52030600  | 0.26479500  | -2.27900300 |
| H | -0.06018900 | -1.66223100 | -2.15421600 |
| H | 0.69150000  | -2.06942200 | 1.39472700  |
| H | -0.37718900 | -0.84738400 | 2.06130600  |
| H | 2.35153700  | -0.53291900 | 0.89577300  |
| H | 1.47654600  | 0.56047700  | 1.96889400  |
| H | -0.14780600 | 2.73559000  | 0.16180100  |
| H | -2.29266900 | 1.69420100  | 0.23393900  |
| O | -1.71638100 | -0.21829600 | 0.04550900  |

### IId-P<sub>1</sub>

|   |             |             |             |
|---|-------------|-------------|-------------|
| C | 1.08789700  | -0.90963600 | -0.47683900 |
| C | 1.40674800  | 0.58955400  | -0.55187800 |
| C | 0.25222600  | 1.46587700  | -0.14212100 |
| H | 0.53737100  | 2.51082600  | -0.21046400 |
| C | 1.00751900  | 0.74291800  | 0.92759400  |
| C | 0.60153500  | -0.74304100 | 0.96135200  |
| C | -0.78268000 | -1.10258500 | 0.36477000  |
| H | -1.20713200 | -2.02963900 | 0.75603200  |
| C | -1.78483900 | 0.03102200  | 0.34193000  |
| C | -1.21607500 | 1.20856500  | -0.45328800 |
| H | 1.54371600  | 1.25064900  | 1.71748000  |
| H | 0.97904800  | -1.34934800 | 1.77901100  |
| H | -1.98018500 | 0.32616200  | 1.37905000  |
| H | -2.73112800 | -0.29977600 | -0.09207300 |
| H | -1.78522600 | 2.11207500  | -0.22227600 |
| H | -1.33091000 | 1.01455700  | -1.52126900 |
| H | 2.25924600  | 1.01346000  | -1.06619800 |
| H | 1.89535200  | -1.58063600 | -0.76733600 |
| O | -0.20176700 | -1.33304700 | -0.94763400 |

|   |             |             |             |
|---|-------------|-------------|-------------|
| C | 0.99187200  | -1.17203600 | -0.71816700 |
| C | 1.54677300  | 0.18170100  | -0.35769100 |
| C | 0.56074900  | 1.39287900  | -0.22667700 |
| H | 1.05372900  | 2.35452000  | -0.41141400 |
| C | 1.06922400  | 0.57336100  | 0.97488900  |
| C | 0.16224100  | -0.54918200 | 1.43714300  |
| C | -0.92747200 | -0.88624400 | 0.46456900  |
| H | -1.56113400 | -1.70790500 | 0.83154400  |
| C | -1.76865200 | 0.33788600  | 0.06633800  |
| C | -0.88358900 | 1.34267600  | -0.70151000 |
| H | 1.74549100  | 1.04672900  | 1.69034100  |
| H | -0.21936900 | -0.45886800 | 2.46432100  |
| H | -2.16439200 | 0.78776000  | 0.99131600  |
| H | -2.63309700 | 0.04567300  | -0.55159100 |
| H | -1.31544500 | 2.35431300  | -0.62646500 |
| H | -0.90125300 | 1.08120200  | -1.77414700 |
| H | 2.55875100  | 0.39096000  | -0.71523500 |
| H | 1.52167500  | -1.75066700 | -1.48728700 |
| O | -0.32397900 | -1.43374600 | -0.75559400 |

### IId-P<sub>2</sub>

|   |             |             |             |
|---|-------------|-------------|-------------|
| C | -1.64627900 | 0.41007600  | 0.45971100  |
| C | -1.10852400 | -0.69098900 | -0.37435400 |
| C | 0.13757600  | -0.58491400 | -1.23635000 |
| H | 0.03313300  | -1.11974800 | -2.17346000 |
| C | 0.18104100  | -1.43129500 | -0.00685000 |
| C | 1.03202900  | -0.94459700 | 1.11043800  |
| C | 1.60882200  | 0.25753700  | 1.11807900  |
| H | 2.21857600  | 0.54847300  | 1.96737400  |
| C | 1.42142400  | 1.26436400  | 0.01625700  |
| C | 1.05047100  | 0.62114200  | -1.32851500 |
| H | 0.12819000  | -2.50671700 | -0.12215000 |
| H | 1.18392100  | -1.62124800 | 1.94475700  |
| H | 2.33464500  | 1.85199500  | -0.10664700 |
| H | 0.65107600  | 1.98606900  | 0.31230200  |
| H | 1.97066200  | 0.27079500  | -1.80639700 |
| H | 0.61615100  | 1.37170000  | -1.99290600 |
| H | -1.90152200 | -1.28965300 | -0.80709400 |
| H | -0.96284700 | 0.86981400  | 1.19339900  |
| O | -2.79141800 | 0.77882200  | 0.38004100  |
